# Supplementary material for: DNase-1 Treatment Exerts Protective Effects in a Rat Model of Intestinal Ischemia-Reperfusion Injury
Source: PubMed Central journal article supplement (PMC6290768; doi:10.1038/s41598-018-36198-2), 2018-12-12
Supplement: 41598_2018_36198_MOESM1_ESM.pdf [file 41598_2018_36198_MOESM1_ESM.pdf]

**DNase-1 Treatment Exerts Protective Effects in a Rat Model of Intestinal Ischemia-Reperfusion Injury**

Shikai Wang<sup>1,\*</sup>, Tian Xie<sup>1,\*</sup>, Shilong Sun<sup>1</sup>, Kai Wang<sup>1</sup>, Baochen Liu<sup>1</sup>, Xingjiang Wu<sup>1</sup>,  
Weiwei Ding<sup>1</sup>

<sup>1</sup>Research Institute of General Surgery, Jinling Hospital, Nanjing University School of Medicine, Nanjing 210002, Jiangsu Province, P.R. China.

\*These authors contributed equally to this work.

Correspondence and requests for materials should be addressed to W.D. (e-mail: dingwei\_nju@hotmail.com)

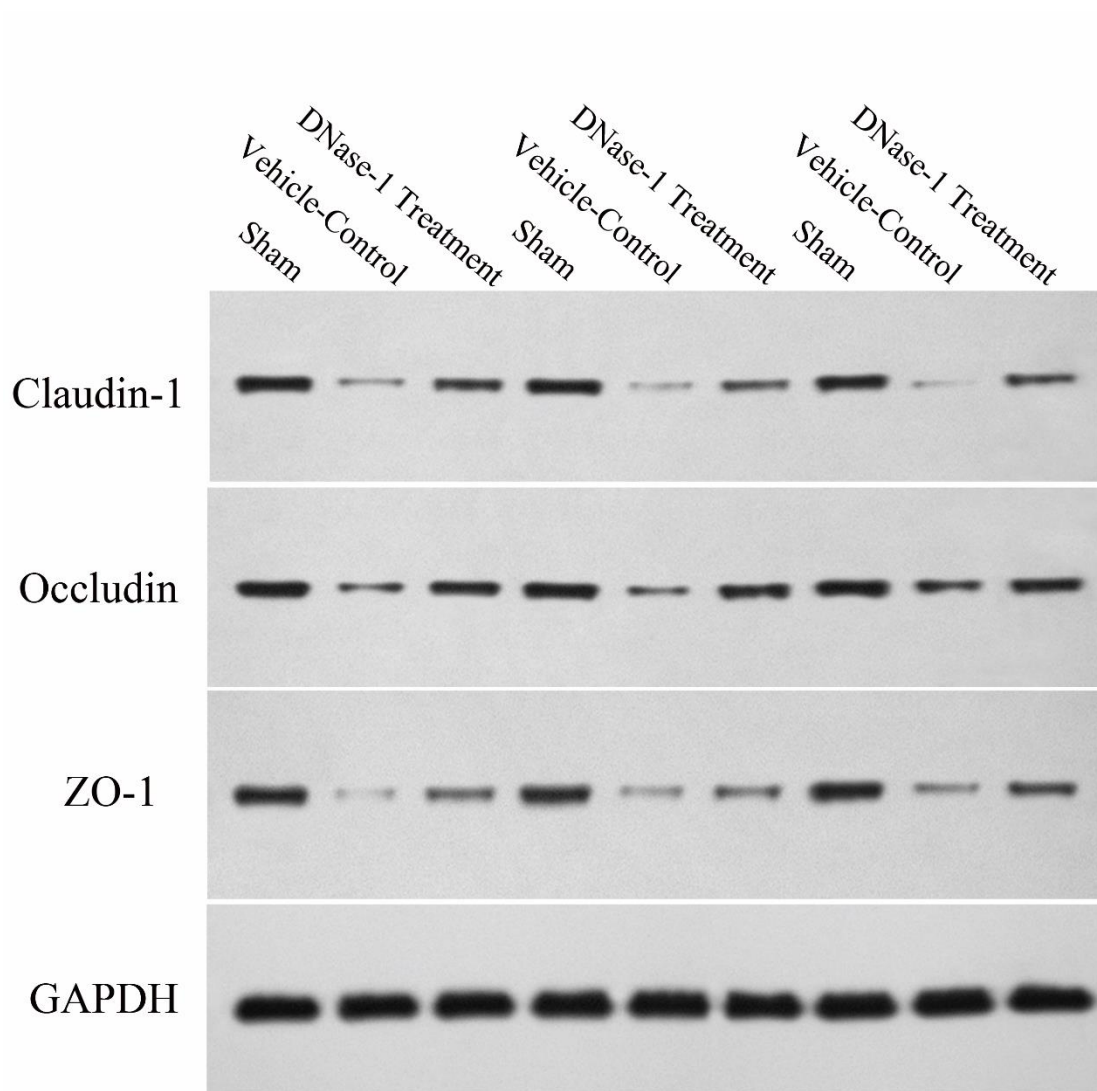

Full-length blots of claudin-1, occluding and zo-1 between groups.
